# Supplementary material for: Metabolic labeling of peptidoglycan enabled optical analysis of probiotic vitality
Source: Royal Society of Chemistry journal article supplement (doi:10.1039/d4ay00982g), 2024-01-01
Supplement: d4ay00982g1.pdf [file d4ay00982g1.pdf]

## Support Information

### Metabolic Labeling of Peptidoglycan Enabled Optical Analysis of Probiotic Vitality

Xinping Hu,<sup>a</sup> Qirong Xiong,<sup>a</sup> Shuai Hou,<sup>\*b</sup> and Hongwei Duan<sup>\*a,c</sup>

<sup>a</sup>*School of Chemistry, Chemical Engineering and Biotechnology, Nanyang Technological University, 70 Nanyang Drive, Singapore, 637457, Singapore.*

<sup>b</sup>*Institute for Advanced Materials, School of Materials Science and Engineering, Jiangsu University, 301 Xuefu Road, Zhenjiang 212013, China.*

<sup>c</sup>*Lee Kong Chian School of Medicine, Nanyang Technological University, Singapore, 636921, Singapore*

\*Corresponding author. H. Duan, Tel: (65) 6514 1019 (office); E-mail: hduan@ntu.edu.sg

S. Hou, E-mail: hou@ujs.edu.sg

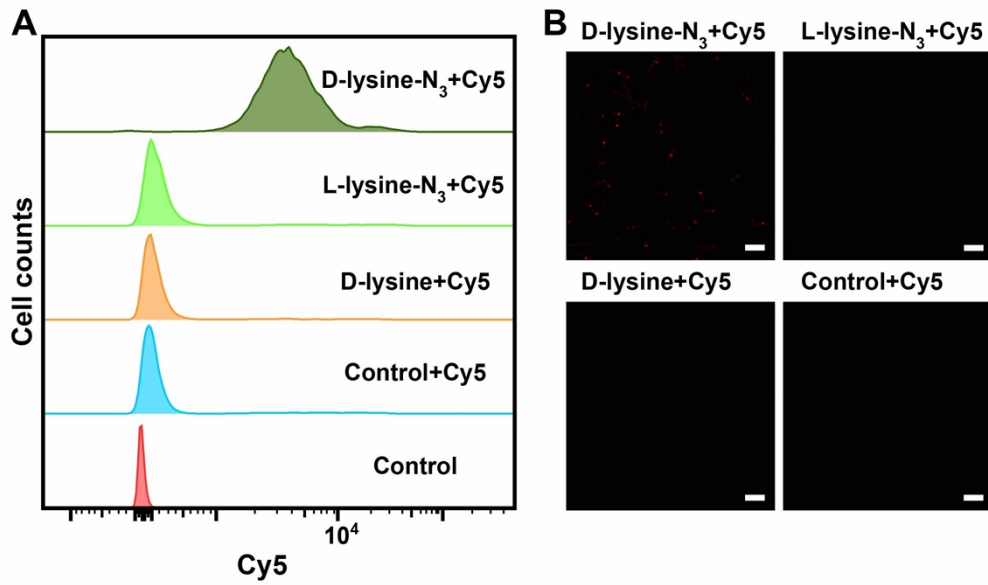

**Figure S1.** (A) Representative flow cytometry results of metabolic labeling on *L. paracasei* with the addition of different structures of amino acids. (B) Representative confocal images of *L. paracasei* via metabolic labeling with different conditions. Red, DBCO-Sulfo-Cy5. Scale bar, 5  $\mu\text{m}$ .

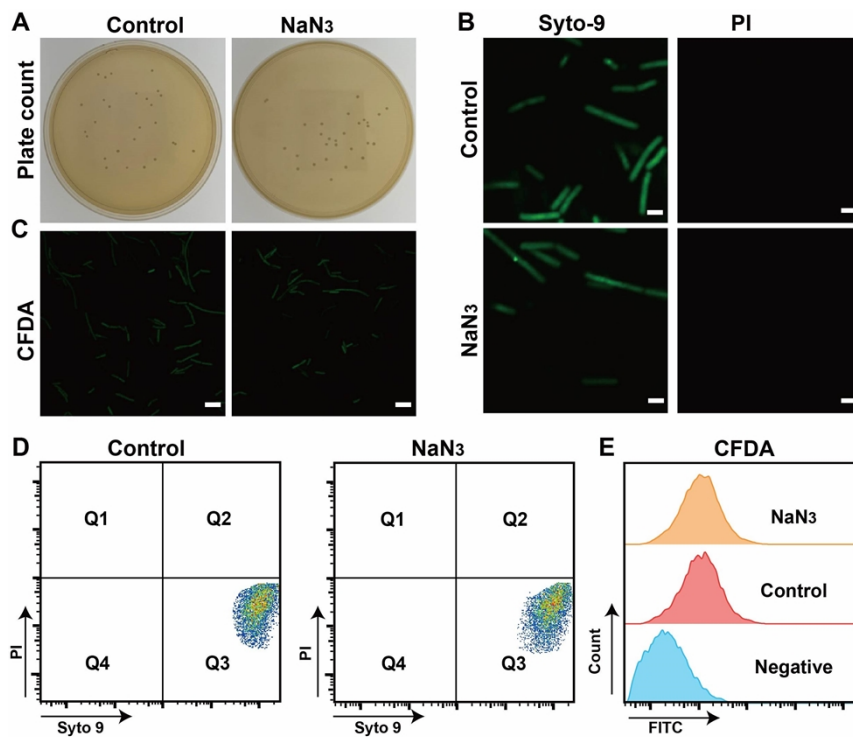

**Figure S2.** (A) Representative standard plate count results of *L. paracasei* after  $\text{NaN}_3$  treatment or not. (B) Representative confocal images of *L. paracasei* with live and dead staining after  $\text{NaN}_3$  treatment or not. Green, Syto-9; Red, Propidium iodide. Scale bar, 2  $\mu\text{m}$ .

$\mu\text{m}$ . (C) Representative confocal images of *L. paracasei* with CFDA staining after  $\text{NaN}_3$  treatment or not. Green, CF (carboxyfluorescein). Scale bar,  $5 \mu\text{m}$ . (D) Representative flow cytometry results showing bacterial live and dead staining of *L. paracasei* after  $\text{NaN}_3$  treatment or not. (E) Representative flow cytometry results showing CFDA staining of *L. paracasei* with  $\text{NaN}_3$  treatment or not. Negative refer to control without the addition of CFDA.

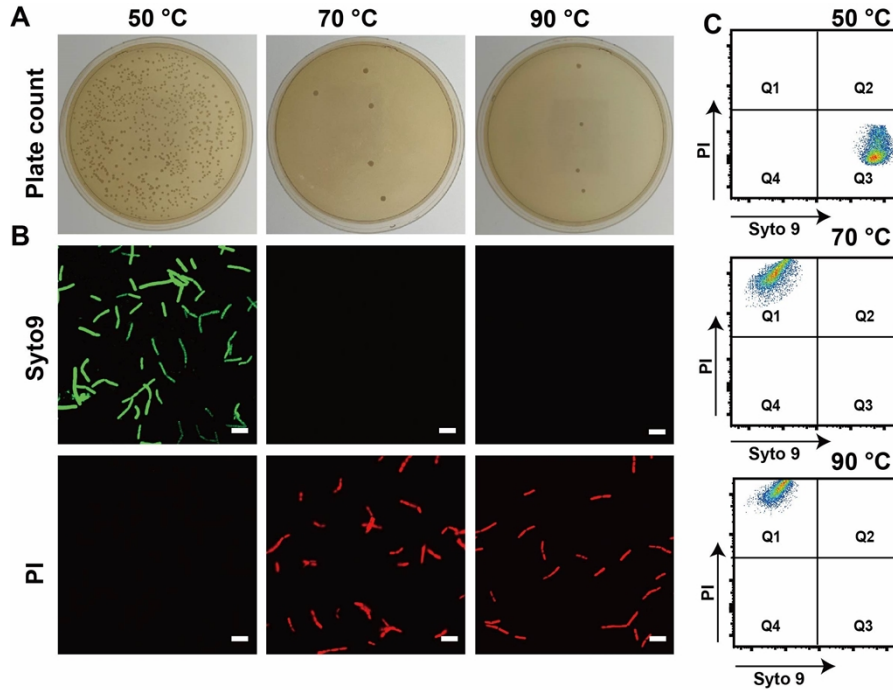

**Figure S3.** (A) Representative standard plate count results of *L. paracasei* after treatment at different temperatures. (B) Representative confocal images of *L. paracasei* with live and dead staining after treatment at different temperatures. Green, Syto-9; Red, Propidium iodide. Scale bar,  $5 \mu\text{m}$ . (C) Representative flow cytometry results showing bacterial live and dead staining of *L. paracasei* after treatment at different temperatures.

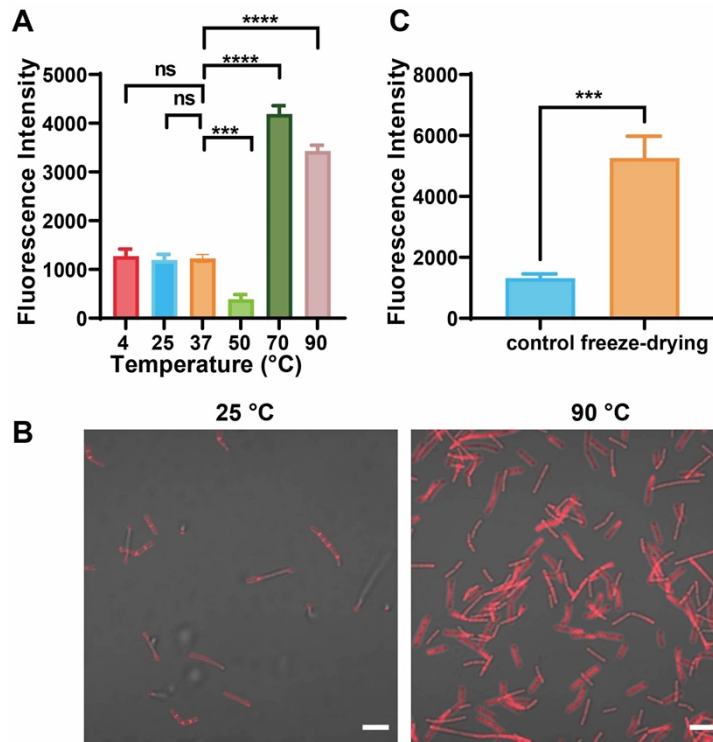

**Figure S4.** (A) Fluorescence intensity of bacterial solutions via metabolic labeling after treatment of different temperatures (n=3).  $^{ns}p>0.05$ ,  $^*p<0.05$ ,  $^{**}p<0.01$ ,  $^{***}p<0.001$ ,  $^{****}p<0.0001$ . (B) Representative confocal images of *L. paracasei* via metabolic labeling after treatment at 25 °C and 90 °C. Red, DBCO-Sulfo-Cy5. Scale bar, 5  $\mu$ m. (C) Fluorescence intensity of bacterial solutions via metabolic labeling after the operation of lyophilization or not (n=3).  $^{ns}p>0.05$ ,  $^*p<0.05$ ,  $^{**}p<0.01$ ,  $^{***}p<0.001$ ,  $^{****}p<0.0001$ .

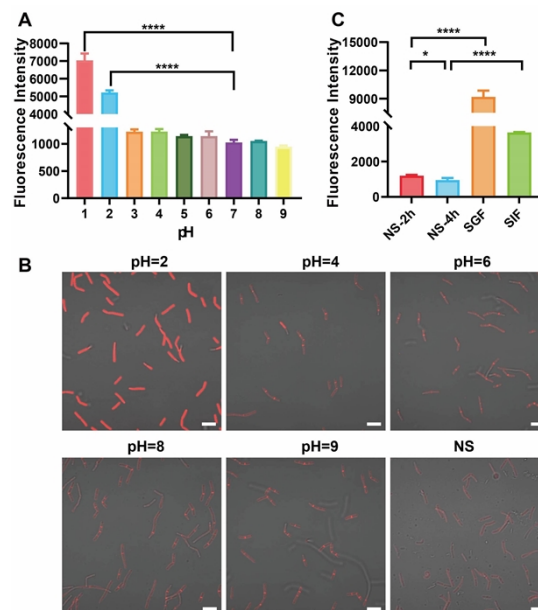

**Figure S5.** (A) Fluorescence intensity of bacterial solutions through metabolic labeling after treatment of different pH values (n=3).  $^{ns}p>0.05$ ,  $^*p<0.05$ ,  $^{**}p<0.01$ ,  $^{***}p<0.001$ ,

\*\*\*\* $p < 0.0001$ . (B) Representative confocal images of *L. paracasei* via metabolic labeling after treatment at different pH values and culture medium. Red, DBCO-Sulfo-Cy5. Scale bar, 5  $\mu\text{m}$ . (C) Fluorescence intensity of bacterial solutions via metabolic labeling after the treatment of SGF or SIF ( $n=3$ ).  $^{ns}p > 0.05$ ,  $^*p < 0.05$ ,  $^{**}p < 0.01$ ,  $^{***}p < 0.001$ ,  $^{****}p < 0.0001$ .

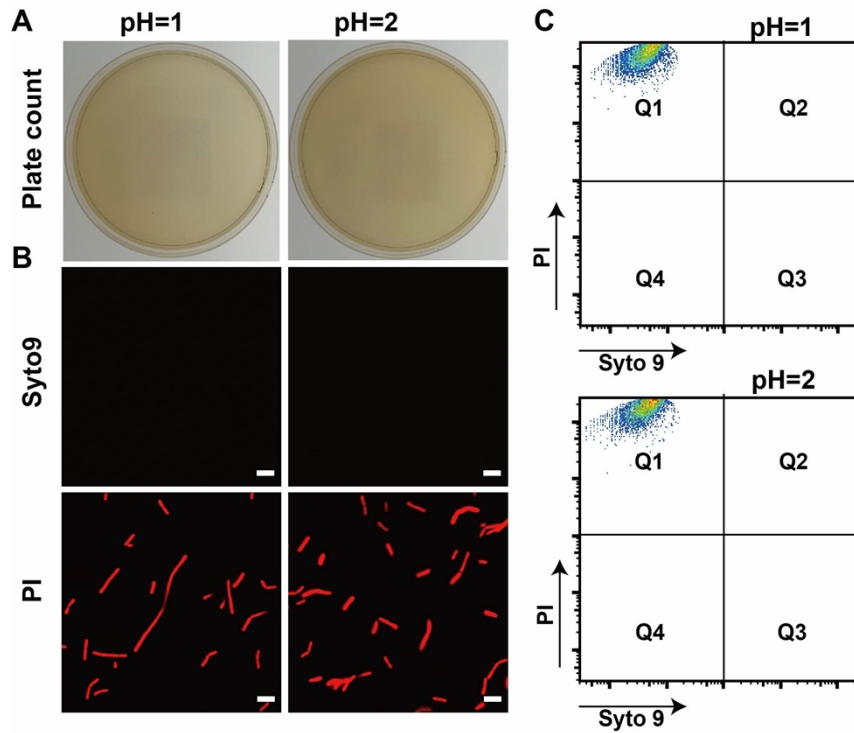

**Figure S6.** (A) Representative standard plate count results of *L. paracasei* after treatment at different pH values. (B) Representative confocal images of *L. paracasei* with live and dead staining after the treatment of pH=1 and 2. Green, Syto-9; Red, Propidium iodide. Scale bar, 5  $\mu\text{m}$ . (C) Representative flow cytometry results showing bacterial live and dead staining of *L. paracasei* after the treatment of pH=1 and 2.

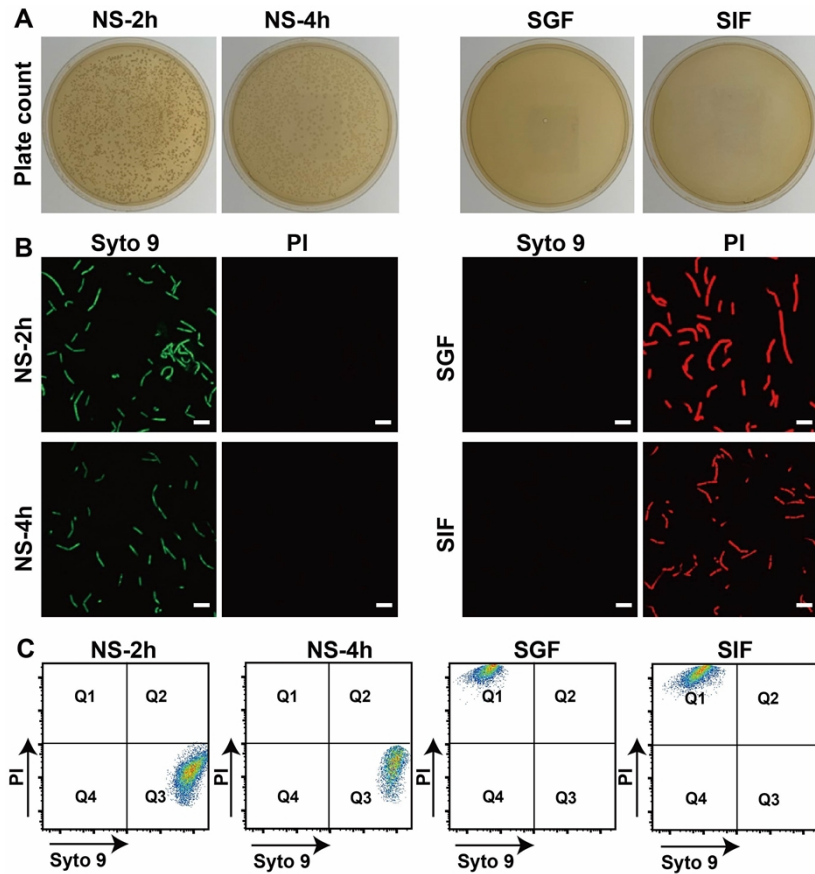

**Figure S7.** (A) Representative standard plate count results of *L. paracasei* after treatment in normal saline for 2h (NS-2h), SGF for 2h, normal saline for 4h (NS-4h), and SIF for 4 h. (B) Representative confocal images of *L. paracasei* with live and dead staining after being cultured in normal saline for 2h (NS-2h), SGF for 2h, normal saline for 4h (NS-4h), and SIF for 4 h. Green, Syto-9; Red, Propidium iodide. Scale bar, 5  $\mu$ m. (C) Representative flow cytometry results showing bacterial live and dead staining of *L. paracasei* after the treatment in normal saline for 2h (NS-2h), SGF for 2h, normal saline for 4h (NS-4h), and SIF for 4 h.

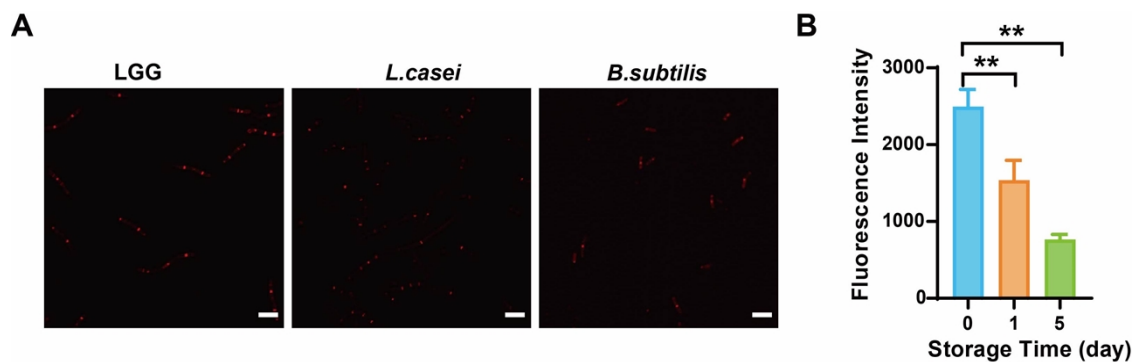

**Figure S8.** (A) Representative confocal images of *L. rhamnosus* GG, *L. casei* and *B. subtilis* via metabolic labeling under normal culturing conditions. Red, DBCO-Sulfo-Cy5. (B) Bar graph showing fluorescence intensity of *L. rhamnosus* GG, *L. casei* and *B. subtilis* over time. Error bars represent standard deviation. Statistical significance is indicated by double asterisks (\*\*).

Scale bar, 5  $\mu\text{m}$ . (B) Fluorescence intensity of the bacterial solutions via metabolic labeling with different storage time (n=3). <sup>ns</sup>p>0.05, \*p<0.05, \*\*p<0.01, \*\*\*p<0.001, \*\*\*\*p<0.0001.
